# Supplementary material for: Seasonality and heterogeneity of malaria transmission determine success of interventions in high-endemic settings: a modeling study
Source: Springer Nature journal article supplement (doi:10.1186/s12879-018-3319-y), 2018-08-22
Supplement: MOESM1 [file 16064482]

| Parameter                         | Value                   |
|-----------------------------------|-------------------------|
| Antigen switch rate               | $7.645 \times 10^{-10}$ |
| Antigenicity factor (nonspecific) | 0.4151                  |
| Gametocyte production rate        | 0.0615                  |
| Gametocyte mosquito survival rate | 0.002                   |
| Gametocyte stage survival rate    | 0.5886                  |
| Falciparum MSP variants           | 32                      |
| Falciparum nonspecific Types      | 76                      |
| MSP merozoite kill fraction       | 0.5117                  |
| Max individual infections         | 3                       |

Table 1: Best fit parameters from immune and infectiousness calibrations
