# Supplementary material for: Seasonality and heterogeneity of malaria transmission determine success of interventions in high-endemic settings: a modeling study
Source: Springer Nature journal article supplement (doi:10.1186/s12879-018-3319-y), 2018-08-22
Supplement: MOESM2 [file 16064482]

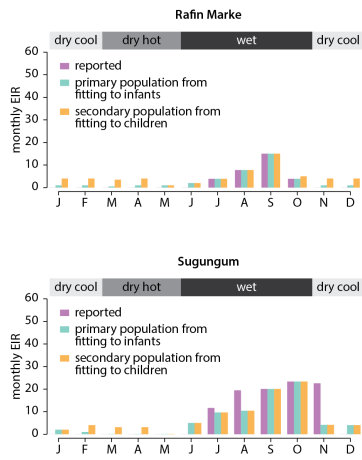

Figure 1: Measured and inferred EIRs used for calibration in Rafin Marke and Sugungum. Het pop split for Rafin Marke and Sugungum?

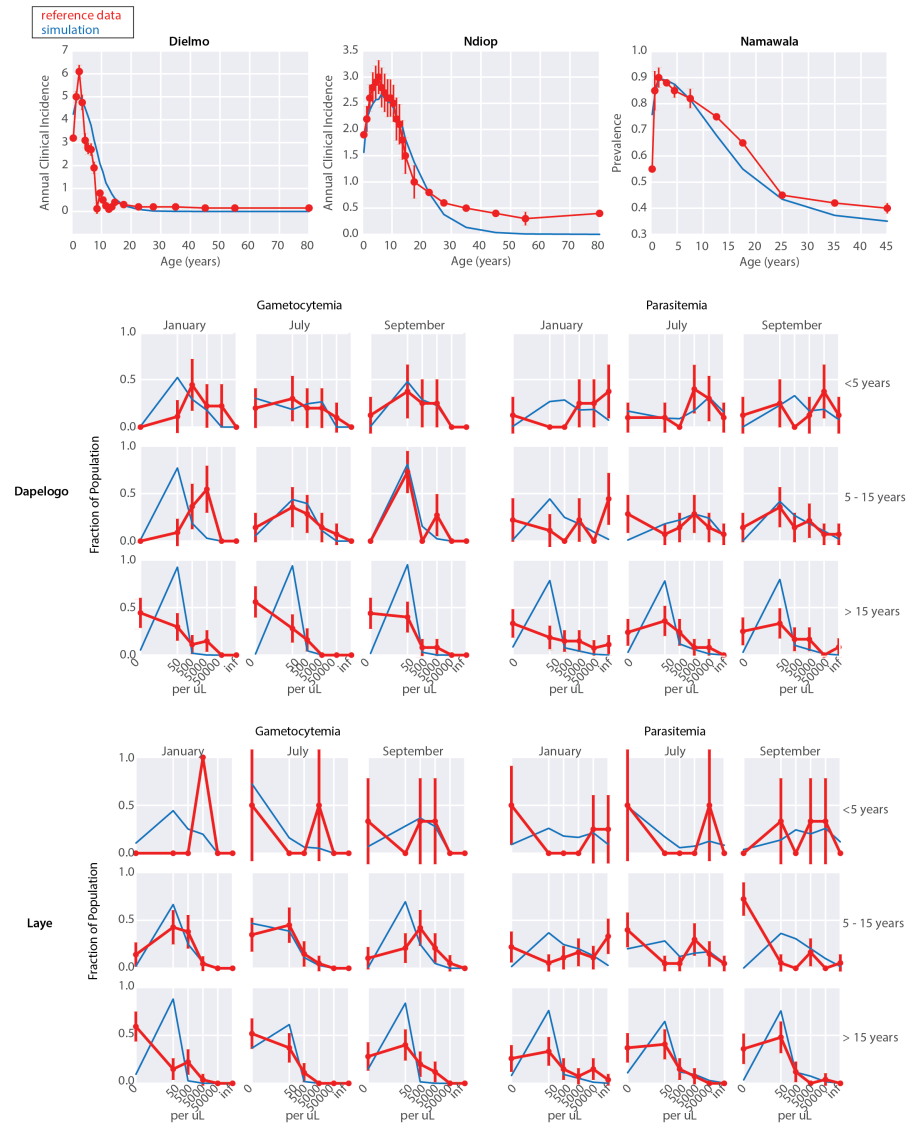

Figure 2: Comparison of reference data and calibrated simulation for Dielmo, Ndiop, Namawala, Dapelogo, and Laye study sites.

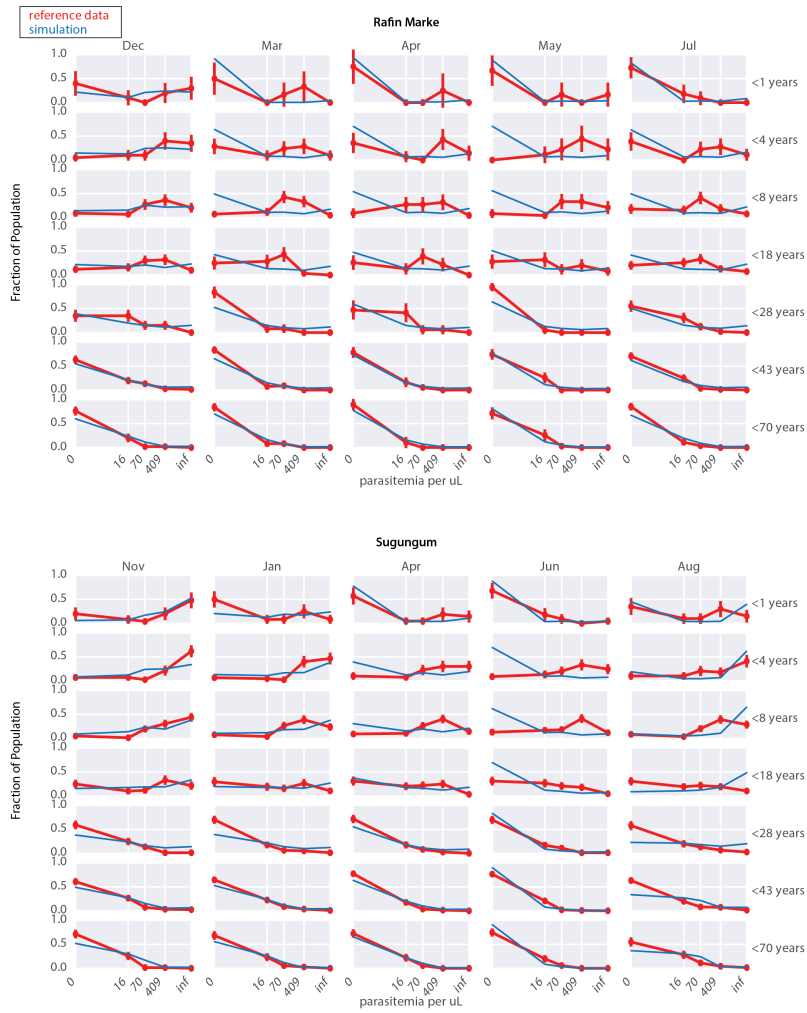

Figure 3: Comparison of reference data and calibrated simulation for Garki study sites not shown in main text.

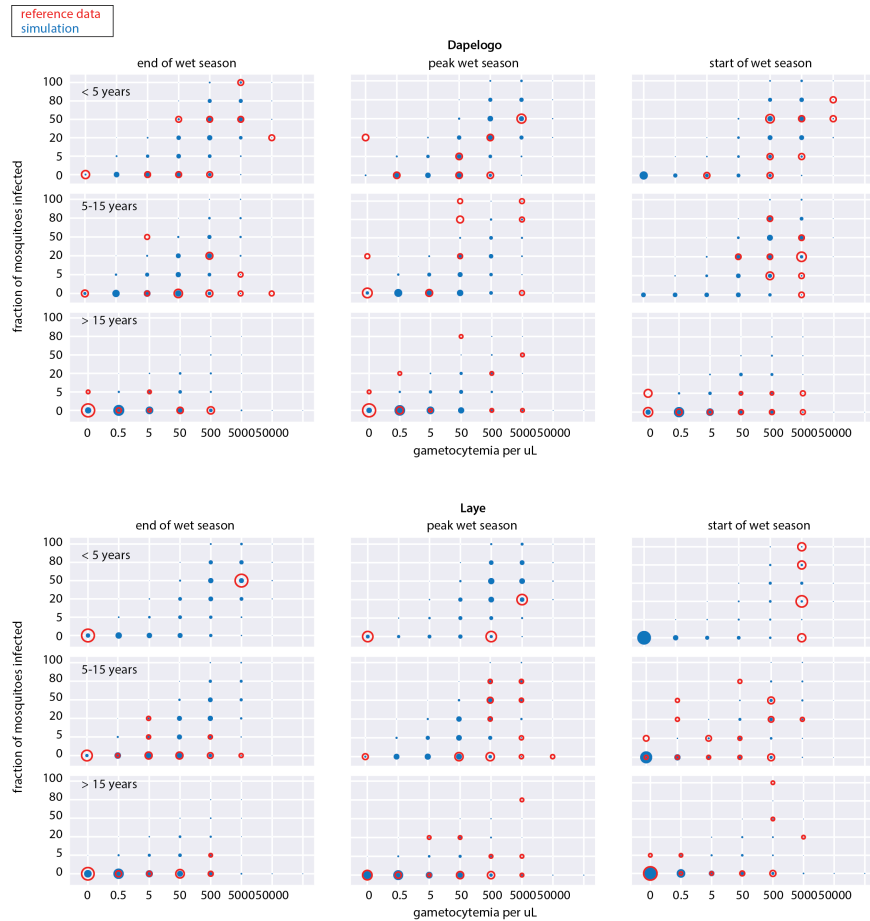

Figure 4: Comparison of reference data and calibrated simulation for relationship between gametocyte density and infectiousness to mosquitoes as measured in two Burkina Faso study sites.

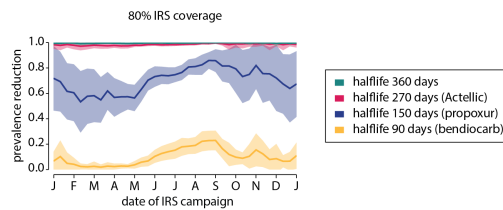

Figure 5: Optimal timing of IRS campaigns with IRS at 80% coverage.

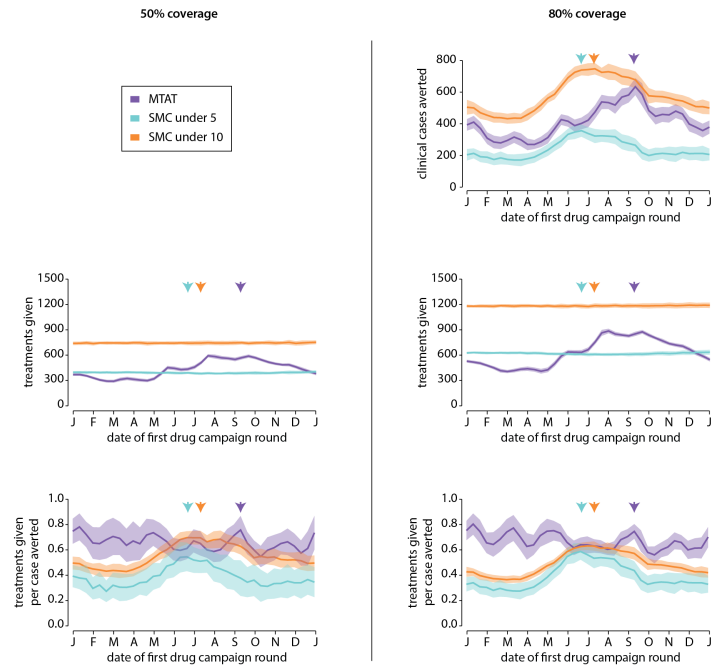

Figure 6: Cases averted and number of treatments given under various conditions of MTAT and SMC timing at 50 and 80% campaign coverage.

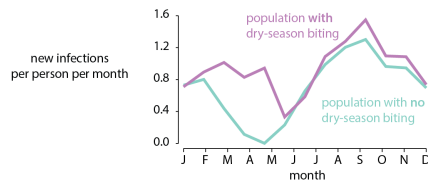

Figure 7: New infections per person per month in a population where 50% of individuals experience dry-season biting and 50% do not.
